# Supplementary material for: Advancing studies on global biocrust distribution
Source: Copernicus journal article supplement (doi:10.5194/soil-10-763-2024), 2024-10-24
Supplement: Supplementary file 1 [file soil-10-763-2024-supplement.zip]

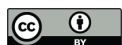

*Supplement of*

## **Advancing studies on global biocrust distribution**

**Siqing Wang et al.**

*Correspondence to:* Ning Chen (cn@lzu.edu.cn)

- soil-10-763-2024-supplement-title-page.pdf
- biocrust\_database.xlsx

The copyright of individual parts of the supplement might differ from the article licence.
