# Supplementary material for: Advancing studies on global biocrust distribution
Source: Copernicus journal article supplement (doi:10.5194/soil-10-763-2024), 2024-10-24
Supplement: Supplementary file 1 [file soil-10-763-2024-supplement.zip]

## Sheet: GlobalData
ID	biocrust_cover	ai	arid_gradient
1	50	0.3742	semiarid
2	68	0.0818	arid
3	35	0.0573	arid
4	45	0.1007	arid
5	55	0.0995	arid
6	60	0.0995	arid
7	60	0.1019	arid
8	30	0.1037	arid
9	0	0.0843	arid
10	20	0.1047	arid
11	35	0.0913	arid
12	4	0.0891	arid
13	10	0.1068	arid
14	30	0.1105	arid
15	32	0.1117	arid
16	29	0.1133	arid
17	3	0.1156	arid
18	10	0.1164	arid
19	18	0.1187	arid
20	0	0.122	arid
21	0	0.1186	arid
22	67.1	0.1397	arid
23	0.5	0.0981	arid
24	2	0.1042	arid
25	5.8	0.0981	arid
26	0.1	0.1056	arid
27	11.6	0.0895	arid
28	17.5	0.0949	arid
29	0.1	0.0953	arid
30	0.8	0.0792	arid
31	2	0.0397	hyperarid
32	0.1	0.0393	hyperarid
33	0.8	0.4725	semiarid
34	0.1	0.3384	semiarid
35	4	0.0993	arid
36	10	0.115	arid
37	25	0.3137	semiarid
38	2	0.246	semiarid
39	1	0.2461	semiarid
40	5	0.246	semiarid
41	5	0.458	semiarid
42	5	0.4667	semiarid
43	5	0.4667	semiarid
44	1	0.4667	semiarid
45	5	0.4514	semiarid
46	5	0.4809	semiarid
47	1	0.455	semiarid
48	1	0.4841	semiarid
49	5	0.4687	semiarid
50	5	0.7461	humid
51	0.1	0.6817	humid
52	1	0.8995	humid
53	1	0.8995	humid
54	1	0.8995	humid
55	25	0.8995	humid
56	5	0.8995	humid
57	1	0.2594	semiarid
58	1	0.2593	semiarid
59	5	0.2155	semiarid
60	25	0.2981	semiarid
61	5	0.2485	semiarid
62	10	0.2516	semiarid
63	1	0.2478	semiarid
64	1	0.7687	humid
65	1	0.2522	semiarid
66	1	0.2142	semiarid
67	30	0.2647	semiarid
68	1	0.2268	semiarid
69	5	0.2441	semiarid
70	1	0.2637	semiarid
71	40	0.241	semiarid
72	1	0.7687	humid
73	1	0.1992	arid
74	1	0.1987	arid
75	3	0.7113	humid
76	5	0.7528	humid
77	5	0.8707	humid
78	5	0.6954	humid
79	1	0.365	semiarid
80	1	0.357	semiarid
81	1	0.3669	semiarid
82	1	0.3133	semiarid
83	1	0.7847	humid
84	1	0.1286	arid
85	5	0.253	semiarid
86	1	0.2843	semiarid
87	1	0.2845	semiarid
88	1	0.2843	semiarid
89	1	0.2845	semiarid
90	1	0.5679	dry subhumid
91	2	0.2511	semiarid
92	20	0.1203	arid
93	0.1		non arid
94	2	0.798	humid
95	0.1	0.0736	arid
96	9.1	0.0989	arid
97	2	0.194	arid
98	0.1	0.2559	semiarid
99	2	0.2559	semiarid
100	0.1	0.2545	semiarid
101	50	0.4517	semiarid
102	1	0.287	semiarid
103	1	0.2833	semiarid
104	1	0.3261	semiarid
105	1	0.3303	semiarid
106	1	0.2756	semiarid
107	30	0.2792	semiarid
108	1	0.323	semiarid
109	2	0.3	semiarid
110	5	0.2781	semiarid
111	5	0.2809	semiarid
112	1	0.8174	humid
113	1	0.8642	humid
114	1	0.3074	semiarid
115	1	1.0615	humid
116	2	0.9075	humid
117	0.1	0.1798	arid
118	15	0.2276	semiarid
119	0.1	0.6471	dry subhumid
120	0.1	1.1296	humid
121	0.1	0.9789	humid
122	13.1	0.7815	humid
123	5	0.9032	humid
124	1	0.9176	humid
125	0.1	0.7766	humid
126	1	0.7097	humid
127	6	0.7008	humid
128	0.1	0.7082	humid
129	10	0.8165	humid
130	0.1	0.5735	dry subhumid
131	65	0.4973	semiarid
132	0.1	0.548	dry subhumid
133	0.1	1.0515	humid
134	1	0.7214	humid
135	0.2	0.8455	humid
136	2	0.8096	humid
137	0.1	0.7905	humid
138	0.1	0.899	humid
139	0.6	0.5154	dry subhumid
140	0.1	0.558	dry subhumid
141	0.1	0.5447	dry subhumid
142	0.1	0.5454	dry subhumid
143	10	0.5405	dry subhumid
144	2.1	0.541	dry subhumid
145	0.1	0.6199	dry subhumid
146	0.1	0.5119	dry subhumid
147	0.5	0.5647	dry subhumid
148	10	0.5276	dry subhumid
149	0.1	0.5745	dry subhumid
150	0.5	0.5453	dry subhumid
151	12	0.549	dry subhumid
152	7	0.5703	dry subhumid
153	6	0.4998	semiarid
154	3	0.5731	dry subhumid
155	15	0.5111	dry subhumid
156	0.5	0.9391	humid
157	0.5		non arid
158	8	0.9273	humid
159	0.5	0.9244	humid
160	0.1	0.955	humid
161	5	0.9057	humid
162	1	0.3339	semiarid
163	13	0.2685	semiarid
164	8	1.0114	humid
165	0.1	1.0664	humid
166	25	0.7299	humid
167	0.1	1.0162	humid
168	0.1	0.824	humid
169	0.1	1.1923	humid
170	0.1	1.0137	humid
171	0.1	1.0426	humid
172	0.1	1.141	humid
173	0.1	1.1843	humid
174	0.1	1.2145	humid
175	0.1	0.617	dry subhumid
176	0.6	0.617	dry subhumid
177	0.2	0.617	dry subhumid
178	7.6	0.7614	humid
179	0.1	0.2595	semiarid
180	0.1	0.2725	semiarid
181	0.1	0.2595	semiarid
182	10	0.2737	semiarid
183	0.1	0.227	semiarid
184	25	0.2296	semiarid
185	7.2	0.4113	semiarid
186	0.1	0.4236	semiarid
187	14	0.1844	arid
188	1	0.283	semiarid
189	0.2	0.2335	semiarid
190	0.1	0.2505	semiarid
191	0.1	0.3675	semiarid
192	0.1	0.3651	semiarid
193	0.1	0.4261	semiarid
194	0.1	0.5751	dry subhumid
195	0.1	0.2859	semiarid
196	20	0.3271	semiarid
197	58.4	0.2946	semiarid
198	3	0.2154	semiarid
199	0.1	0.7671	humid
200	0.1	0.9521	humid
201	0.1	0.2397	semiarid
202	0.1		non arid
203	0.1	0.2693	semiarid
204	18	0.6993	humid
205	0.1	0.896	humid
206	0.1	0.3222	semiarid
207	0.1	0.3515	semiarid
208	0.1	0.3515	semiarid
209	0.1	0.7037	humid
210	0.1	0.341	semiarid
211	0.1	0.3421	semiarid
212	0.1	0.3566	semiarid
213	0.1	0.3246	semiarid
214	0.1	0.3478	semiarid
215	0.1	0.3255	semiarid
216	0.1	0.3777	semiarid
217	0.1	0.4087	semiarid
218	11.8	0.678	humid
219	1	0.4481	semiarid
220	10	0.4482	semiarid
221	0.1	0.5495	dry subhumid
222	5	0.2848	semiarid
223	0.1	0.3145	semiarid
224	40.1	0.297	semiarid
225	2	0.291	semiarid
226	7	0.8184	humid
227	51	0.8184	humid
228	4.4	0.8184	humid
229	10	0.4608	semiarid
230	0.1	0.3866	semiarid
231	1	0.4269	semiarid
232	0.1	0.4484	semiarid
233	0.1	0.4484	semiarid
234	0.1	1.0287	humid
235	11	0.2782	semiarid
236	30	0.3326	semiarid
237	1	0.3326	semiarid
238	1	0.9477	humid
239	0.1	0.8254	humid
240	0.1	0.5463	dry subhumid
241	0.1	0.5972	dry subhumid
242	0.1	0.5341	dry subhumid
243	0.5	1.1298	humid
244	8	0.1469	arid
245	0.1	0.8848	humid
246	0.1	0.3326	semiarid
247	17	0.5623	dry subhumid
248	0.1	0.7599	humid
249	0.2	0.7541	humid
250	24	0.6571	humid
251	0.2	0.3668	semiarid
252	1	0.6103	dry subhumid
253	2	0.3449	semiarid
254	0.1	0.2342	semiarid
255	30	0.2342	semiarid
256	0.1	0.8698	humid
257	0.1	0.6402	dry subhumid
258	0.1	0.2909	semiarid
259	0.4	0.5225	dry subhumid
260	1	0.2885	semiarid
261	0.1	0.6846	humid
262	0.1	0.1044	arid
263	0.1	0.6995	humid
264	0.1	0.7601	humid
265	0.1	0.6805	humid
266	0.1	0.6772	humid
267	0.1	0.7624	humid
268	0.1	0.6964	humid
269	0.2	0.7861	humid
270	0.1	0.2725	semiarid
271	0.1	0.3686	semiarid
272	0.1	0.9238	humid
273	0.2	0.9408	humid
274	0.1	0.9238	humid
275	0.1	0.9235	humid
276	0.1	0.9235	humid
277	0.2	0.9235	humid
278	0.4	0.9151	humid
279	0.1	0.9531	humid
280	0.1	0.9382	humid
281	0.1	0.9224	humid
282	0.1	0.9382	humid
283	2	0.8078	humid
284	0.1	0.4427	semiarid
285	0.1	0.5639	dry subhumid
286	0.1	0.6759	humid
287	0.1	0.7666	humid
288	0.1	0.8138	humid
289	0.1	0.7313	humid
290	0.1	0.8515	humid
291	4	1.6371	humid
292	24.5	1.6371	humid
293	2.2	1.4693	humid
294	0.1	0.5639	dry subhumid
295	1.6	0.6421	dry subhumid
296	0.1	0.1437	arid
297	1	0.8888	humid
298	14	0.9159	humid
299	0.1	0.9302	humid
300	5.5	0.4816	semiarid
301	82.5	0.0645	arid
302	62.5	2.6071	humid
303	34.1	0.2582	semiarid
304	6.4	0.2582	semiarid
305	4.3	0.2582	semiarid
306	1	0.1861	arid
307	73.7		non arid
308	5	0.1858	arid
309	5	0.17	arid
310	60.6	0.0412	hyperarid
311	47.8	0.0413	hyperarid
312	61.9	0.0747	arid
313	53.5	0.5711	dry subhumid
314	55.2	0.3526	semiarid
315	68	0.1213	arid
316	75.4	0.1291	arid
317	69.3	0.1463	arid
318	75	0.2366	semiarid
319	7.8	0.061	arid
320	0	0.3141	semiarid
321	80	0.3141	semiarid
322	80	0.3141	semiarid
323	80	0.3141	semiarid
324	90	0.3141	semiarid
325	50	0.3141	semiarid
326	80	0.3141	semiarid
327	69.8	0.1743	arid
328	46.4	0.1743	arid
329	27.3	0.2574	semiarid
330	42.7	0.2574	semiarid
331	1	0.3603	semiarid
332	1	0.3603	semiarid
333	57.5	0.2101	semiarid
334	61.6	0.2101	semiarid
335	86	0.7544	humid
336	61	0.7982	humid
337	0	0.8296	humid
338	34	0.8255	humid
339	10	0.8445	humid
340	45	0.7852	humid
341	18	0.7268	humid
342	26	0.7856	humid
343	53	0.8022	humid
344	6	0.8098	humid
345	29	0.2939	semiarid
346	52	0.2939	semiarid
347	83.74	0.235	semiarid
348	23.54	0.235	semiarid
349	21.1	0.173	arid
350	8	0.173	arid
351	50	0.219	semiarid
352	6	0.15	arid
353	16	0.15	arid
354	4.5	0.1822	arid
355	30	0.2446	semiarid
356	75	0.2446	semiarid
357	30	0.2425	semiarid
358	12	0.2482	semiarid
359	30	0.2482	semiarid
360	17	0.2482	semiarid
361	51	0.2403	semiarid
362	38	0.2	semiarid
363	33.6	0.2	semiarid
364	4.2	0.1379	arid
365	5.9	0.17	arid
366	2.7	0.1891	arid
367	4.2	0.1676	arid
368	10.9	0.1704	arid
369	8.6	0.17	arid
370	9.9	0.1307	arid
371	8.7	0.1425	arid
372	2.7	0.15	arid
373	7.3	0.1751	arid
374	2	0.1891	arid
375	3.4	0.1751	arid
376	4	0.1704	arid
377	5.5	0.15	arid
378	5.5	0.1425	arid
379	4.1	0.1676	arid
380	2.3	0.1307	arid
381	2.1	0.1379	arid
382	25	0.0987	arid
383	50	0.0635	arid
384	12.7	0.1307	arid
385	2	0.5511	dry subhumid
386	72	0.3609	semiarid
387	81	0.3609	semiarid
388	74	0.3609	semiarid
389	2	0.14	arid
390	38	0.1406	arid
391	31	0.1457	arid
392	28	0.1429	arid
393	9	0.1364	arid
394	39	0.1375	arid
395	30.5	0.1141	arid
396	90	0.1141	arid
397	100	0.1331	arid
398	95	0.2725	semiarid
399	50	0.2725	semiarid
400	83.4	0.1222	arid
401	84.6	0.1222	arid
402	65	0.7053	humid
403	70	0.7053	humid
404	15	0.1849	arid
405	38.1	0.1052	arid
406	42	0.1159	arid
407	38	0.1224	arid
408	8.4	0.2095	semiarid
409	0	0.2473	semiarid
410	7	0.2041	semiarid
411	92	0.0439	hyperarid
412	96	0.0665	arid
413	30	0.3424	semiarid
414	15	0.3402	semiarid
415	15	0.3431	semiarid
416	15	0.3431	semiarid
417	15	0.3402	semiarid
418	15	0.3402	semiarid
419	30	0.3413	semiarid
420	30	0.3392	semiarid
421	45	0.3392	semiarid
422	30	0.3361	semiarid
423	30	0.3361	semiarid
424	30	0.3361	semiarid
425	45	0.3472	semiarid
426	45	0.3472	semiarid
427	45	0.3472	semiarid
428	45	0.3403	semiarid
429	40	0.3528	semiarid
430	45	0.3547	semiarid
431	40	0.6531	humid
432	40	0.6512	humid
433	40	0.6512	humid
434	40	0.6049	dry subhumid
435	40	0.6223	dry subhumid
436	40	0.5995	dry subhumid
437	40	0.5743	dry subhumid
438	40	0.5442	dry subhumid
439	40	0.5414	dry subhumid
440	40	0.5513	dry subhumid
441	30	0.34	semiarid
442	12.7	0.1806	arid
443	90	0.1157	arid
444	90	0.129	arid
445	90	0.0987	arid
446	45	0.2636	semiarid
447	20	0.5401	dry subhumid
448	11.8	0.5577	dry subhumid
449	80	0.0364	hyperarid
450	31.8	0.7313	humid
451	33	0.0798	arid
452	15.3	0.0827	arid
453	18.3	0.1219	arid
454	30	0.1111	arid
455	78	0.6311	dry subhumid
456	77	0.5944	dry subhumid
457	55	0.4513	semiarid
458	90	1.1513	humid
459	97	1.2298	humid
460	92	1.4145	humid
461	20	0.0483	hyperarid
462	37.2	0.1049	arid
463	8.1	0.18	arid
464	30	0.1278	arid
465	50	0.1538	arid
466	50	0.6549	humid
467	55.5	0.0472	hyperarid
468	38.3	0.2046	semiarid
469	14.3	0.1747	arid
470	89.5	0.0904	arid
471	75	0.2419	semiarid
472	90	0.0989	arid
473	85	0.1005	arid
474	0	0.0864	arid
475	84	0.1096	arid
476	66	0.107	arid
477	52	0.1031	arid
478	42	0.095	arid
479	20	0.0942	arid
480	37.9	0.2009	semiarid
481	26.1	0.1572	arid
482	80	0.4877	semiarid
483	8	0.4819	semiarid
484	80	0.1257	arid
485	88.97	0.1857	arid
486	45.53	0.2129	semiarid
487	63.2	0.1334	arid
488	0	0.1296	arid
489	13.67	0.1247	arid
490	0	0.1804	arid
491	0	0.1097	arid
492	0	0.2325	semiarid
493	0	0.2433	semiarid
494	0	0.2725	semiarid
495	4.1	0.0839	arid
496	66.83	0.236	semiarid
497	0	0.2471	semiarid
498	81.33	0.0863	arid
499	0	0.2561	semiarid
500	0	0.2088	semiarid
501	13.83	0.207	semiarid
502	67.43	0.2119	semiarid
503	20.4	0.1826	arid
504	0	0.156	arid
505	3.67	0.1729	arid
506	57.53	0.1448	arid
507	57.13	0.1912	arid
508	0	0.2401	semiarid
509	86.6	0.232	semiarid
510	56.1	0.1505	arid
511	19.27	0.2976	semiarid
512	0	0.3193	semiarid
513	28.7	0.2698	semiarid
514	86.27	0.1102	arid
515	82.77	0.1218	arid
516	0	0.2633	semiarid
517	88.73	0.2126	semiarid
518	50.5	0.1716	arid
519	37.4	0.2243	semiarid
520	63.47	0.2456	semiarid
521	28.87	0.4214	semiarid
522	14.97	0.3172	semiarid
523	7.6	0.3304	semiarid
524	7.73	0.3269	semiarid
525	0	0.3482	semiarid
526	7.67	0.2461	semiarid
527	18.27	0.3461	semiarid
528	0	0.441	semiarid
529	0	0.4143	semiarid
530	45.5	0.1517	arid
531	4	0.1496	arid
532	15	0.2218	semiarid
533	90	0.084	arid
534	93	0.1977	arid
535	83	0.1977	arid
536	79	0.1977	arid
537	87	0.1977	arid
538	74	0.1977	arid
539	36.1	0.1777	arid
540	89.5	0.195	arid
541	37	0.1782	arid
542	43.5	0.267	semiarid
543	31.7	0.1497	arid
544	23	0.2516	semiarid
545	29.2	0.2518	semiarid
546	37.8	0.3057	semiarid
547	33.6	0.2698	semiarid
548	36.4	0.2645	semiarid
549	36.5	0.2131	semiarid
550	22.9	0.2667	semiarid
551	25.4	0.2978	semiarid
552	20.5	0.2276	semiarid
553	38.3	0.1992	arid
554	25.5	0.2339	semiarid
555	31.2	0.2603	semiarid
556	41.9	0.1774	arid
557	14.4	0.2409	semiarid
558	31.4	0.2409	semiarid
559	26.2	0.2544	semiarid
560	30.8	0.2547	semiarid
561	14.1	0.2545	semiarid
562	36.1	0.2654	semiarid
563	5	0.2545	semiarid
564	50	0.2545	semiarid
565	86.8	0.0631	arid
566	8.7	0.0631	arid
567	83.7	0.0782	arid
568	11	0.0782	arid
569	52	0.5216	dry subhumid
570	45		non arid
571	79.54	0.2949	semiarid
572	65.32	0.2143	semiarid
573	22.1	0.6345	dry subhumid
574	10	0.5617	dry subhumid
575	16.4	0.0635	arid
576	0.6	0.5404	dry subhumid
577	1.3	0.5404	dry subhumid
578	12.1	0.5404	dry subhumid
579	5.2	0.5404	dry subhumid
580	21.5	0.1623	arid
581	95	0.3632	semiarid
582	45	0.2181	semiarid
583	30.3	0.4916	semiarid
584	37.5	0.3238	semiarid
585	31.5	0.2743	semiarid
586	29	0.263	semiarid
587	28	0.2679	semiarid
588	46.5	0.2736	semiarid
589	46.5	0.2775	semiarid
590	46.5	0.2777	semiarid
591	46.5	0.2764	semiarid
592	46.5	0.2379	semiarid
593	46.5	0.2444	semiarid
594	46.5	0.2595	semiarid
595	46.5	0.2503	semiarid
596	46.5	0.2503	semiarid
597	46.5	0.2566	semiarid
598	46.5	0.2566	semiarid
599	46.5	0.2587	semiarid
600	46.5	0.2527	semiarid
601	2.6	1.1009	humid
602	30.6	0.1842	arid
603	0.3	0.1052	arid
604	10	0.4965	semiarid
605	52.5	0.1182	arid
606	13.1	0.1352	arid
607	23	0.2837	semiarid
608	42	0.2636	semiarid
609	35	0.2489	semiarid
610	7	0.1933	arid
611	6.5	0.1933	arid
612	3.3	0.1933	arid
613	50	0.0515	arid
614	2	0.0925	arid
615	23	0.0925	arid
616	40	0.0935	arid
617	9	0.0935	arid
618	39.2	0.2199	semiarid
619	6	0.4521	semiarid
620	4.1	0.1273	arid
621	7	0.1601	arid
622	37.8	0.2116	semiarid
623	44	0.1915	arid
624	57.7	0.7019	humid
625	51.5	0.1838	arid
626	53.6	0.1389	arid
627	37.5	0.8914	humid
628	37.5	0.902	humid
629	78	0.3437	semiarid
630	49	0.101	arid
631	61	0.2814	semiarid
632	5.7	0.1024	arid
633	6.7	0.0962	arid
634	2.1	0.0936	arid
635	0.6	0.0722	arid
636	3	0.0717	arid
637	8	0.0784	arid
638	41.7	0.0761	arid
639	27.1	0.0857	arid
640	63.9	0.1865	arid
641	6	0.067	arid
642	12.4	0.0756	arid
643	43.6	0.0944	arid
644	71.3	0.3979	semiarid
645	75	0.0483	hyperarid
646	7.4	0.1217	arid
647	25	0.06	arid
648	47.6	0.2038	semiarid
649	30	0.0747	arid
650	23	0.0664	arid
651	58.5	0.2461	semiarid
652	40	0.2474	semiarid
653	49.9	0.1447	arid
654	31.7	0.1255	arid
655	8.2	0.2323	semiarid
656	53.9	0.2785	semiarid
657	26	0.4001	semiarid
658	5.6	0.4001	semiarid
659	69	0.0588	arid
660	96	0.1019	arid
661	13.1	0.0776	arid
662	9.2	0.0702	arid
663	0	0.1063	arid
664	0.5	0.1081	arid
665	15.3	0.104	arid
666	37.5	0.236	semiarid
667	20	0.1517	arid
668	48	0.2673	semiarid
669	55	0.2673	semiarid
670	42	0.2673	semiarid
671	36	0.2673	semiarid
672	24	0.2673	semiarid
673	20	0.2673	semiarid
674	65	0.1217	arid
675	40	0.1306	arid
676	70	0.1381	arid
677	45	0.1381	arid
678	40	0.137	arid
679	50	0.1655	arid
680	25	0.1635	arid
681	30	0.1543	arid
682	45	0.1942	arid
683	0.3	0.1385	arid
684	63.3	0.0538	arid
685	44.2		non arid
686	2.5	0.1601	arid
687	88.6	0.6024	dry subhumid
688	88.2	0.5933	dry subhumid
689	40	0.2451	semiarid
690	13.6	0.7875	humid
691	5.3	0.0839	arid
692	0.8		non arid
693	3.31		non arid
694	58	0.7852	humid
695	1	0.8057	humid
696	90	0.1866	arid
697	40	0.1421	arid
698	94	0.1026	arid
699	42	0.087	arid
700	97.5	0.0871	arid
701	81	0.182	arid
702	1	0.1228	arid
703	94.5	0.0841	arid
704	25	0.1275	arid
705	77.5	0.219	semiarid
706	21	0.1572	arid
707	18.3	0.0761	arid
708	20	0.1193	arid
709	56.3	0.2869	semiarid
710	61.3	0.2838	semiarid
711	80	0.5246	dry subhumid
712	88	0.3321	semiarid
713	81	0.3321	semiarid
714	79	0.3321	semiarid
715	40	0.2199	semiarid
716	78.2	0.1977	arid
717	95	0.2673	semiarid
718	11	0.2097	semiarid
719	26	0.115	arid
720	40	0.1388	arid
721	39	0.1945	arid
722	39	0.1158	arid
723	19	0.1158	arid
724	69	0.0706	arid
725	79.5	0.0757	arid
726	75	0.0513	arid
727	27	0.1299	arid
728	18	0.4219	semiarid
729	4	0.542	dry subhumid
730	31.39	0.2665	semiarid
731	14.49	0.2663	semiarid
732	23.25	0.237	semiarid
733	64.24	0.2661	semiarid
734	0	0.2171	semiarid
735	71.17	0.2502	semiarid
736	49.83	0.2546	semiarid
737	3.22	0.2534	semiarid
738	22.16	0.2109	semiarid
739	69.3	0.2141	semiarid
740	13	0.2553	semiarid
741	0	0.2553	semiarid
742	0	0.2506	semiarid
743	55.92	0.2383	semiarid
744	10.24	0.248	semiarid
745	0	0.2293	semiarid
746	0	0.212	semiarid
747	17.58	0.2081	semiarid
748	43.42	0.2405	semiarid
749	56	0.252	semiarid
750	25.17	0.2507	semiarid
751	13.96	0.2662	semiarid
752	22.59	0.2339	semiarid
753	7.07	0.2415	semiarid
754	39.09	0.2718	semiarid
755	27.25	0.2261	semiarid
756	19.29	0.2029	semiarid
757	25.49	0.2518	semiarid
758	37.92	0.2408	semiarid
759	0	0.1955	arid
760	27.59	0.2239	semiarid
761	23.83	0.1968	arid
762	20.58	0.1895	arid
763	23.04	0.2168	semiarid
764	22.91	0.2528	semiarid
765	30.92	0.2537	semiarid
766	0	0.2216	semiarid
767	45.59	0.2393	semiarid
768	37.59	0.188	arid
769	23.67	0.195	arid
770	57.5	0.0195	hyperarid
771	65	0.0833	arid
772	69	0.1388	arid
773	69	0.1606	arid
774	7.5	0.1258	arid
775	8.5	0.5903	dry subhumid
776	59.1	0.0656	arid
777	28		non arid
778	38.3		non arid
779	23		non arid
780	15.7		non arid
781	36		non arid
782	8.68	0.3821	semiarid
783	50	0.4769	semiarid
784	32.3	0.138	arid
785	2	0.1401	arid
786	9	0.1395	arid
787	92.3	0.0361	hyperarid
788	88	0.31	semiarid
789	30	0.1408	arid
790	0.7	0.1371	arid
791	0.7	0.1358	arid
792	2.6	0.4057	semiarid
793	0	0.2533	semiarid
794	0	0.0968	arid
795	0	0.0935	arid
796	0.2	0.1053	arid
797	0	0.1133	arid
798	0	0.1219	arid
799	0	0.1237	arid
800	0	0.1116	arid
801	0	0.1357	arid
802	0	0.128	arid
803	0	0.1173	arid
804	0	0.09	arid
805	0	0.0931	arid
806	0	0.1853	arid
807	0.2	0.1608	arid
808	0	0.1608	arid
809	0.6	0.0944	arid
810	0	0.4008	semiarid
811	0	0.2946	semiarid
812	0.1	0.2038	semiarid
813	0.1	0.3014	semiarid
814	0	0.1951	arid
815	0	0.2531	semiarid
816	0	0.2733	semiarid
817	1.8	0.1055	arid
818	0	0.2567	semiarid
819	0	0.1158	arid
820	0	0.1055	arid
821	0	0.0998	arid
822	0.5	0.1059	arid
823	0.2	0.4101	semiarid
824	0.2	0.1449	arid
825	0.2	0.1059	arid
826	1.1	0.1371	arid
827	0	0.1489	arid
828	0.2	0.1345	arid
829	0	0.1381	arid
830	0	0.1371	arid
831	0.5	0.1374	arid
832	0.6	0.1383	arid
833	0	0.0948	arid
834	0.8	0.1011	arid
835	2.4	0.2983	semiarid
836	6.2	0.2751	semiarid
837	0.2	0.0996	arid
838	0.2	0.1139	arid
839	0.4	0.2162	semiarid
840	0	0.1437	arid
841	0.1	0.2325	semiarid
842	0	0.0872	arid
843	0.1	0.2369	semiarid
844	0	0.3195	semiarid
845	0	0.3195	semiarid
846	0.2	0.3008	semiarid
847	0	0.1555	arid
848	0.3	0.2809	semiarid
849	0.2	0.1634	arid
850	0	0.1656	arid
851	0	0.3038	semiarid
852	0	0.1102	arid
853	0	0.1321	arid
854	0	0.1256	arid
855	0	0.1042	arid
856	0.1	0.1308	arid
857	0	0.2256	semiarid
858	0.2	0.1121	arid
859	0	0.154	arid
860	1.2	0.1507	arid
861	1.7	0.1507	arid
862	0.4	0.087	arid
863	0	0.0921	arid
864	0	0.1498	arid
865	0.6	0.1228	arid
866	0	0.1142	arid
867	0	0.2322	semiarid
868	0.3	0.1606	arid
869	0.9	0.1984	arid
870	0	0.1081	arid
871	0	0.1141	arid
872	0	0.1762	arid
873	0	0.4244	semiarid
874	3	0.387	semiarid
875	0	0.3109	semiarid
876	0.4	0.6494	dry subhumid
877	0	0.1493	arid
878	0	0.1334	arid
879	0.6	0.1638	arid
880	1.2	0.1536	arid
881	0	0.0943	arid
882	10.1	0.4054	semiarid
883	0	0.1422	arid
884	3	0.3665	semiarid
885	0.4	0.263	semiarid
886	6.3	0.2645	semiarid
887	0	0.1405	arid
888	0.3	0.394	semiarid
889	0	0.1091	arid
890	0	0.1086	arid
891	0.3	0.1039	arid
892	0.5	0.179	arid
893	0	0.1685	arid
894	0	0.1275	arid
895	0.2	0.2581	semiarid
896	0	0.0997	arid
897	0.1	0.1608	arid
898	0	0.1622	arid
899	0.2	0.1562	arid
900	0	0.1507	arid
901	1.8	0.183	arid
902	0.3	0.1141	arid
903	0.1	0.0953	arid
904	0	0.1957	arid
905	0	0.1027	arid
906	0.1	0.1115	arid
907	0	0.4423	semiarid
908	0	0.1297	arid
909	0.2	0.1322	arid
910	0	0.4368	semiarid
911	0.4	0.1287	arid
912	0	0.4198	semiarid
913	0	0.1333	arid
914	0	0.1099	arid
915	0	0.1111	arid
916	0	0.1168	arid
917	0	0.0959	arid
918	0.2	0.1519	arid
919	0	0.0907	arid
920	0	0.601	dry subhumid
921	0	0.1037	arid
922	0	0.1296	arid
923	0	0.1079	arid
924	0	0.109	arid
925	0	0.1015	arid
926	0	0.0965	arid
927	0	0.2172	semiarid
928	0.1	0.1001	arid
929	0	0.1589	arid
930	0	0.1239	arid
931	0	0.0904	arid
932	0.8	0.0979	arid
933	0	0.1186	arid
934	0.4	0.2571	semiarid
935	0	0.2601	semiarid
936	0.2	0.2917	semiarid
937	0.2	0.093	arid
938	0.2	0.0871	arid
939	0	0.118	arid
940	0	0.1112	arid
941	2.8	0.4581	semiarid
942	0.6	0.1887	arid
943	0	0.1048	arid
944	0	0.1489	arid
945	0	0.1099	arid
946	0	0.1151	arid
947	0	0.1183	arid
948	0	0.093	arid
949	0	0.1278	arid
950	0	0.1087	arid
951	0	0.2871	semiarid
952	0	0.1077	arid
953	0	0.1362	arid
954	1	0.4511	semiarid
955	1.4	0.3299	semiarid
956	14.2	0.3299	semiarid
957	0	0.1484	arid
958	0	0.1433	arid
959	0	0.1234	arid
960	0	0.1632	arid
961	0	0.0864	arid
962	25.2	0.3535	semiarid
963	0.5	0.3398	semiarid
964	0	0.2189	semiarid
965	0	0.1762	arid
966	0	0.1034	arid
967	0	0.1416	arid
968	1.2	0.4052	semiarid
969	0.1	0.1629	arid
970	0.3	0.1541	arid
971	0.8	0.5159	dry subhumid
972	1.4	0.5045	dry subhumid
973	3.8	0.5028	dry subhumid
974	1.8	0.4932	semiarid
975	4.4	0.4838	semiarid
976	5.8	0.4893	semiarid
977	2.6	0.4871	semiarid
978	0	0.1327	arid
979	1	0.353	semiarid
980	0.7	0.1142	arid
981	0	0.2236	semiarid
982	0	0.1222	arid
983	0	0.0861	arid
984	0.1	0.211	semiarid
985	0	0.1584	arid
986	1	0.1082	arid
987	0	0.0992	arid
988	0	0.1089	arid
989	0	0.3197	semiarid
990	0	0.1161	arid
991	0	0.1159	arid
992	2.2	0.1996	arid
993	0.2	0.2441	semiarid
994	0	0.0866	arid
995	0.1	0.0847	arid
996	0.5	0.1494	arid
997	0.1	0.1073	arid
998	0.1	0.1019	arid
999	0	0.183	arid
1000	1.2	0.1716	arid
1001	0	0.1672	arid
1002	0.5	0.1665	arid
1003	0	0.107	arid
1004	0.2	0.1222	arid
1005	0.4	0.0996	arid
1006	0.3	0.1044	arid
1007	0	0.1104	arid
1008	0.4	0.1377	arid
1009	0.2	0.1578	arid
1010	0	0.1644	arid
1011	0	0.1271	arid
1012	1.4	0.1093	arid
1013	0	0.0972	arid
1014	0.1	0.1044	arid
1015	0	0.126	arid
1016	0	0.1126	arid
1017	0	0.1147	arid
1018	0	0.1041	arid
1019	0	0.1221	arid
1020	0.1	0.1038	arid
1021	0	0.0993	arid
1022	0	0.1234	arid
1023	0	0.1195	arid
1024	0	0.1927	arid
1025	0	0.1135	arid
1026	0.2	0.1003	arid
1027	6	0.1614	arid
1028	0.2	0.2987	semiarid
1029	0	0.3007	semiarid
1030	0.2	0.1422	arid
1031	0	0.1079	arid
1032	0.1	0.158	arid
1033	0.3	0.1293	arid
1034	0.2	0.1204	arid
1035	0	0.1434	arid
1036	0	0.1018	arid
1037	0	0.1271	arid
1038	0.1	0.1845	arid
1039	0	0.1154	arid
1040	0	0.1109	arid
1041	0	0.2496	semiarid
1042	0	0.1145	arid
1043	0.2	0.098	arid
1044	0	0.191	arid
1045	0	0.1057	arid
1046	0	0.1204	arid
1047	0	0.151	arid
1048	0	0.1067	arid
1049	0	0.4405	semiarid
1050	0	0.1665	arid
1051	0	0.0988	arid
1052	1.1	0.21	semiarid
1053	0.5	0.1822	arid
1054	0	0.1008	arid
1055	0.3	0.1043	arid
1056	0	0.0983	arid
1057	0.2	0.117	arid
1058	0.1	0.5941	dry subhumid
1059	0.1	0.0981	arid
1060	2.3	0.214	semiarid
1061	0.1	0.1719	arid
1062	0	0.1102	arid
1063	0	0.1099	arid
1064	0	0.1123	arid
1065	0.1	0.0917	arid
1066	1	0.1866	arid
1067	6.8	0.189	arid
1068	0	0.0834	arid
1069	0	0.2637	semiarid
1070	0	0.097	arid
1071	0	0.133	arid
1072	0.7	0.1038	arid
1073	0.2	0.1273	arid
1074	0.2	0.0897	arid
1075	0.6	0.1172	arid
1076	0	0.4056	semiarid
1077	0	0.1032	arid
1078	0.8	0.1494	arid
1079	0.1	0.1138	arid
1080	0	0.1231	arid
1081	0	0.1966	arid
1082	0.1	0.2403	semiarid
1083	0	0.1148	arid
1084	0.3	0.1972	arid
1085	0	0.128	arid
1086	1	0.5623	dry subhumid
1087	2.4	0.1976	arid
1088	1.5	0.2043	semiarid
1089	0.6	0.2054	semiarid
1090	1.9	0.2153	semiarid
1091	0.7	0.197	arid
1092	4.6	0.2015	semiarid
1093	0.2	0.2104	semiarid
1094	0.4	0.2074	semiarid
1095	0.7	0.2123	semiarid
1096	0	0.3215	semiarid
1097	0.2	0.1142	arid
1098	0.1	0.1532	arid
1099	0	0.0992	arid
1100	2.2	0.1648	arid
1101	3.7	0.1447	arid
1102	0	0.1261	arid
1103	1.5	0.1379	arid
1104	0	0.2141	semiarid
1105	2	0.3701	semiarid
1106	0	0.1489	arid
1107	0	0.1482	arid
1108	0	0.1225	arid
1109	0	0.1389	arid
1110	0.2	0.111	arid
1111	0.8	0.1297	arid
1112	1.2	0.4308	semiarid
1113	0	0.1128	arid
1114	0	0.1135	arid
1115	4.6	0.4931	semiarid
1116	0	0.253	semiarid
1117	0.2	0.1289	arid
1118	0	0.1437	arid
1119	0	0.1439	arid
1120	0	0.1468	arid
1121	0	0.4415	semiarid
1122	0	0.2219	semiarid
1123	0.1	0.2242	semiarid
1124	0.4	0.2962	semiarid
1125	0.2	0.2962	semiarid
1126	0.4	0.3131	semiarid
1127	0.6	0.3048	semiarid
1128	0.2	0.1386	arid
1129	0.6	0.1383	arid
1130	0	0.1367	arid
1131	0	0.1366	arid
1132	1.3	0.1332	arid
1133	1	0.1989	arid
1134	0	0.1309	arid
1135	0	0.138	arid
1136	0	0.5074	dry subhumid
1137	0	0.1279	arid
1138	0	0.1191	arid
1139	0	0.1308	arid
1140	0	0.0985	arid
1141	0	0.1365	arid
1142	0	0.1347	arid
1143	0	0.2206	semiarid
1144	0	0.2738	semiarid
1145	0	0.1994	arid
1146	3.2	0.1972	arid
1147	0.6	0.1978	arid
1148	0	0.1874	arid
1149	0.4	0.4402	semiarid
1150	0	0.1796	arid
1151	0	0.1796	arid
1152	1.8	0.2646	semiarid
1153	7.4	0.2524	semiarid
1154	5.2	0.2568	semiarid
1155	5.8	0.4929	semiarid
1156	0	0.1123	arid
1157	2.9	0.1431	arid
1158	0	0.2859	semiarid
1159	9.5	0.2566	semiarid
1160	0	0.1731	arid
1161	0	0.108	arid
1162	0.1	0.0883	arid
1163	0	0.0973	arid
1164	0	0.1273	arid
1165	0.2	0.351	semiarid
1166	0	0.1193	arid
1167	2.2	0.1352	arid
1168	0.4	0.1681	arid
1169	0.1	0.1701	arid
1170	0	0.0906	arid
1171	0	0.1525	arid
1172	0	0.1525	arid
1173	2.8	0.1961	arid
1174	0.3	0.106	arid
1175	0	0.1061	arid
1176	0	0.0972	arid
1177	0.1	0.1067	arid
1178	0.2	0.1102	arid
1179	0	0.1126	arid
1180	0.2	0.1398	arid
1181	0.1	0.4755	semiarid
1182	0	0.5023	dry subhumid
1183	0.4	0.1236	arid
1184	0.5	0.1052	arid
1185	0	0.114	arid
1186	5.2	0.4925	semiarid
1187	2.2	0.4273	semiarid
1188	0.1	0.1171	arid
1189	0	0.4386	semiarid
1190	0	0.1632	arid
1191	0.2	0.1351	arid
1192	0	0.2872	semiarid
1193	0.6	0.3133	semiarid
1194	0	0.11	arid
1195	0.1	0.1538	arid
1196	0	0.0757	arid
1197	0	0.1556	arid
1198	0.1	0.3398	semiarid
1199	0	0.2653	semiarid
1200	0	0.1174	arid
1201	8	0.2507	semiarid
1202	0	0.1349	arid
1203	0	0.2473	semiarid
1204	3.5	0.1178	arid
1205	11	0.1279	arid
1206	0	0.1408	arid
1207	0	0.1266	arid
1208	0.3	0.1308	arid
1209	0	0.1274	arid
1210	0	0.1404	arid
1211	0.1	0.1308	arid
1212	0	0.1304	arid
1213	0	0.1263	arid
1214	0	0.1338	arid
1215	0	0.129	arid
1216	0.2	0.1272	arid
1217	0	0.1345	arid
1218	0.3	0.4186	semiarid
1219	0	0.1864	arid
1220	0.2	0.1037	arid
1221	0	0.1043	arid
1222	2.2	0.5602	dry subhumid
1223	52.5	0.0944	arid
1224	77.5	0.1228	arid
1225	10.4	0.1251	arid
1226	90	0.6282	dry subhumid
1227	55.5	0.1345	arid
1228	89.11	0.1345	arid
1229	97.54	0.1345	arid
1230	65.64	0.1345	arid
1231	67.21	0.1345	arid
1232	72.51	0.1345	arid
1233	61.71	0.1345	arid
1234	93.44	0.1345	arid
1235	61.7	0.1557	arid
1236	76	0.0825	arid
1237	0	1.8338	humid
1238	3	1.8338	humid
1239	48	1.8338	humid
1240	60	1.8338	humid
1241	21.7	0.4939	semiarid
1242	38.3	0.2248	semiarid
1243	2.3	0.0169	hyperarid
1244	28.3	0.0511	arid
1245	5.7	0.0303	hyperarid
1246	53.3	0.0989	arid
1247	66.7	0.1055	arid
1248	66.7	0.0657	arid
1249	56.7	0.101	arid
1250	20	0.4598	semiarid
1251	25	0.3861	semiarid
1252	46.7	0.2989	semiarid
1253	21.7	0.2647	semiarid
1254	37.7	0.2529	semiarid
1255	41.7	0.2774	semiarid
1256	31.7	0.2774	semiarid
1257	56.7	0.2556	semiarid
1258	8.3	0.0275	hyperarid
1259	14.3	0.4892	semiarid
1260	51.7	0.1294	arid
1261	55	0.1515	arid
1262	81.7	0.254	semiarid
1263	83.7	0.1432	arid
1264	48.3	0.1817	arid
1265	5	0.3463	semiarid
1266	11.9	0.1267	arid
1267	1.5	0.1378	arid
1268	0.1	0.1494	arid
1269	8.7	1.1342	humid
1270	70	0.0538	arid
1271	7.8	0.5678	dry subhumid
1272	60	0.6151	dry subhumid
1273	0	0.1858	arid
1274	0	0.3593	semiarid
1275	18	0.3533	semiarid
1276	0	0.3493	semiarid
1277	0.5	0.3521	semiarid
1278	0	0.181	arid
1279	40	0.3787	semiarid
1280	3	0.1453	arid
1281	40	0.3668	semiarid
1282	20	0.3529	semiarid
1283	0	0.1845	arid
1284	2	0.15	arid
1285	75	0.3658	semiarid
1286	1	0.3103	semiarid
1287	35	0.3629	semiarid
1288	0	0.156	arid
1289	22	0.331	semiarid
1290	0	0.1866	arid
1291	0	0.1866	arid
1292	0	0.1571	arid
1293	35	0.3653	semiarid
1294	35	0.3618	semiarid
1295	45	0.3655	semiarid
1296	15	0.2912	semiarid
1297	10	0.3199	semiarid
1298	70	0.3665	semiarid
1299	0	0.1824	arid
1300	4.5	0.308	semiarid
1301	5	0.1545	arid
1302	0	0.1547	arid
1303	0.2	0.2798	semiarid
1304	0	0.1472	arid
1305	55	0.4167	semiarid
1306	35	0.4138	semiarid
1307	50	0.4138	semiarid
1308	0	0.1805	arid
1309	0	0.1533	arid
1310	10	0.2508	semiarid
1311	0	0.1492	arid
1312	0	0.1875	arid
1313	0	0.2215	semiarid
1314	0	0.1971	arid
1315	10	0.2315	semiarid
1316	0	0.2077	semiarid
1317	0	0.2151	semiarid
1318	0	0.2167	semiarid
1319	50	0.514	dry subhumid
1320	65	0.4744	semiarid
1321	35	0.5755	dry subhumid
1322	45	0.4387	semiarid
1323	35	0.3774	semiarid
1324	60	0.3686	semiarid
1325	15	0.3002	semiarid
1326	27	0.2843	semiarid
1327	50	0.3146	semiarid
1328	40	0.2748	semiarid
1329	40	0.3773	semiarid
1330	65	0.3329	semiarid
1331	25	0.2859	semiarid
1332	35	0.2271	semiarid
1333	15	0.2855	semiarid
1334	15	0.2203	semiarid
1335	10	0.165	arid
1336	10	0.0972	arid
1337	1.5	0.0792	arid
1338	0	0.046	hyperarid
1339	0	0.1188	arid
1340	11	0.1105	arid
1341	0	0.0986	arid
1342	4.6	0.1665	arid
1343	9.66	0.1456	arid
1344	19.33	0.1035	arid
1345	39	0.1615	arid
1346	30	0.1205	arid
1347	35	0.1213	arid
1348	16	0.1321	arid
1349	50	0.1264	arid
1350	50	0.1368	arid
1351	0	0.035	hyperarid
1352	0	0.0367	hyperarid
1353	75	0.2097	semiarid
1354	53.33	0.2524	semiarid
1355	45	0.1758	arid
1356	19.33	0.1758	arid
1357	50.33	0.2197	semiarid
1358	0	0.0211	hyperarid
1359	35	0.1632	arid
1360	0	0.0211	hyperarid
1361	30	0.1331	arid
1362	0	0.1246	arid
1363	0	0.0196	hyperarid
1364	55	0.1678	arid
1365	21	0.1219	arid
1366	40	0.1152	arid
1367	0	0.1064	arid
1368	13.67	0.1634	arid
1369	6.33	0.1655	arid
1370	0	0.167	arid
1371	21.33	0.1602	arid
1372	0	0.1465	arid
1373	0	0.1355	arid
1374	1.17	0.1352	arid
1375	0	0.1353	arid
1376	0	0.144	arid
1377	0	0.112	arid
1378	0	0.1068	arid
1379	0	0.1014	arid
1380	0	0.0972	arid
1381	0	0.0346	hyperarid
1382	0	0.0363	hyperarid
1383	0	0.0418	hyperarid
1384	0	0.0363	hyperarid
1385	13	0.0703	arid
1386	20	0.0878	arid
1387	0	0.0403	hyperarid
1388	11	0.094	arid
1389	0	0.0452	hyperarid
1390	0	0.0518	arid
1391	0	0.0609	arid
1392	1.17	0.0664	arid
1393	0	0.0631	arid
1394	0	0.0606	arid
1395	0	0.0557	arid
1396	0	0.0277	hyperarid
1397	61	0.0607	arid
1398	0	0.0428	hyperarid
1399	0	0.0325	hyperarid
1400	0	0.0308	hyperarid
1401	0	0.05	arid
1402	0	0.0261	hyperarid
1403	0	0.0274	hyperarid
1404	0	0.0234	hyperarid
1405	0	0.0397	hyperarid
1406	0	0.0262	hyperarid
1407	0	0.0262	hyperarid
1408	0	0.0223	hyperarid
1409	0	0.0153	hyperarid
1410	95	0.4606	semiarid
1411	90	0.4202	semiarid
1412	85	0.3071	semiarid
1413	85	0.4365	semiarid
1414	63	0.4357	semiarid
1415	83	0.422	semiarid
1416	50	0.3028	semiarid
1417	95.5	0.4246	semiarid
1418	65.5	0.419	semiarid
1419	71	0.4159	semiarid
1420	87	0.4071	semiarid
1421	81	0.3891	semiarid
1422	76	0.3888	semiarid
1423	84.5	0.3741	semiarid
1424	96	0.3887	semiarid
1425	52	0.3499	semiarid
1426	71.5	0.3834	semiarid
1427	62	0.3823	semiarid
1428	16.05	0.3714	semiarid
1429	79.5	0.3741	semiarid
1430	56	0.3772	semiarid
1431	43	0.3639	semiarid
1432	82.3	0.3636	semiarid
1433	51.5	0.3686	semiarid
1434	89.5	0.3625	semiarid
1435	91.5	0.3606	semiarid
1436	77.5	0.3676	semiarid
1437	99.5	0.3571	semiarid
1438	78.4	0.3708	semiarid
1439	71.5	0.3537	semiarid
1440	87.5	0.3538	semiarid
1441	92	0.2913	semiarid
1442	87.5	0.3437	semiarid
1443	92.5	0.2651	semiarid
1444	84.5	0.2907	semiarid
1445	91	0.347	semiarid
1446	96	0.3438	semiarid
1447	90.5	0.336	semiarid
1448	85.5	0.3346	semiarid
1449	71	0.329	semiarid
1450	88.5	0.2568	semiarid
1451	89.5	0.3346	semiarid
1452	90.5	0.3196	semiarid
1453	75	0.3265	semiarid
1454	83	0.2311	semiarid
1455	84	0.2488	semiarid
1456	86.5	0.2255	semiarid
1457	68.5	0.2277	semiarid
1458	78	0.2235	semiarid
1459	78	0.2449	semiarid
1460	73.5	0.2285	semiarid
1461	72	0.2319	semiarid
1462	76	0.2331	semiarid
1463	87	0.2229	semiarid
1464	90	0.2138	semiarid
1465	87	0.2113	semiarid
1466	59.5	0.2097	semiarid
1467	69.5	0.2091	semiarid
1468	24	0.21	semiarid
1469	59	0.2053	semiarid
1470	36	0.1932	arid
1471	56	0.1825	arid
1472	11	0.184	arid
1473	11	0.1704	arid
1474	62	0.166	arid
1475	33.5	0.1708	arid
1476	14	0.1683	arid
1477	41	0.1661	arid
1478	49	0.1605	arid
1479	57	0.1616	arid
1480	15.5	0.1549	arid
1481	18	0.1473	arid
1482	31	0.1437	arid
1483	49	0.1457	arid
1484	21	0.1417	arid
1485	13	0.1398	arid
1486	3	0.1546	arid
1487	28	0.1532	arid
1488	15	0.1314	arid
1489	30	0.1717	arid
1490	85	0.1935	arid
1491	13	0.1189	arid
1492	26	0.193	arid
1493	0	0.0695	arid
1494	5	0.0616	arid
1495	0	0.6215	dry subhumid
1496	0.5	0.6215	dry subhumid
1497	10	0.622	dry subhumid
1498	6.5	0.5764	dry subhumid
1499	7	0.5903	dry subhumid
1500	1.5	0.6199	dry subhumid
1501	19	0.6	dry subhumid
1502	6	0.7121	humid
1503	8	0.7149	humid
1504	30	0.5329	dry subhumid
1505	70	0.6	dry subhumid
1506	10	0.7554	humid
1507	0	0.6568	humid
1508	0	0.0689	arid
1509	0	0.0542	arid
1510	0	0.0354	hyperarid
1511	0	0.0199	hyperarid
1512	0	0.0305	hyperarid
1513	0	0.0256	hyperarid
1514	10	0.0409	hyperarid
1515	38	0.7318	humid
1516	80	0.1503	arid
1517	70	0.1503	arid
1518	100	0.1503	arid
1519	25	1.0645	humid
1520	41.1	0.101	arid
1521	58	0.2049	semiarid
1522	46	0.2049	semiarid
1523	70	0.2049	semiarid
1524	42	0.2049	semiarid
1525	75	0.2049	semiarid
1526	35	0.2145	semiarid
1527	43	0.2145	semiarid
1528	27	0.2145	semiarid
1529	28	0.2145	semiarid
1530	43	0.2145	semiarid
1531	1	0.2823	semiarid
1532	1	0.2823	semiarid
1533	1	0.2823	semiarid
1534	0	0.2823	semiarid
1535	2	0.2823	semiarid
1536	60	0.2031	semiarid
1537	62	0.2031	semiarid
1538	58	0.2031	semiarid
1539	37	0.2031	semiarid
1540	82	0.2031	semiarid
1541	72	0.2496	semiarid
1542	26.6	0.2809	semiarid
1543	90	0.6719	humid
1544	26	0.2127	semiarid
1545	7.4	0.164	arid
1546	19.7	0.1373	arid
1547	12.3	0.7118	humid
1548	11	0.9771	humid
1549	3	0.231	semiarid
1550	35	0.0061	hyperarid
1551	12.5	0.0444	hyperarid
1552	52.1	0.0437	hyperarid
1553	30	0.1278	arid
1554	60	0.1266	arid
1555	51.3	0.1391	arid
1556	23.5	0.1391	arid
1557	7.1	0.1391	arid
1558	38	0.0833	arid
1559	9	0.7423	humid
1560	80.3	0.3075	semiarid
1561	29.7	0.3282	semiarid
1562	10.7	0.3201	semiarid
1563	24.2	0.2462	semiarid
1564	85	0.3468	semiarid
1565	94.1	0.1007	arid
1566	25.17	0.1109	arid
1567	89.17	0.1009	arid
1568	83.83	0.0906	arid
1569	80.82	0.0992	arid
1570	100	0.1063	arid
1571	92.5	0.3059	semiarid
1572	100	0.1865	arid
1573	83	0.0169	hyperarid
1574	100	0.1132	arid
1575	100	0.3092	semiarid
1576	4	1.4767	humid
1577	86	0.6826	humid
1578	69.1	0.06	arid
1579	69.1	0.0348	hyperarid
1580	12	0.0685	arid
1581	80	0.1332	arid
1582	52.7	0.2321	semiarid
1583	62	0.0597	arid
1584	62	0.0597	arid
1585	47.5	0.0455	hyperarid
1586	7	0.2796	semiarid
1587	3	0.3376	semiarid
1588	16	0.2003	semiarid
1589	7	0.3096	semiarid
1590	45.8	0.1944	arid
1591	66	0.1725	arid
1592	34.8	0.1725	arid
1593	50	0.0161	hyperarid
1594	50	0.0224	hyperarid
1595	50	0.0272	hyperarid
1596	20	0.0424	hyperarid
1597	20	0.0424	hyperarid
1598	35	0.037	hyperarid
1599	50	0.0531	arid
1600	34.5	0.215	semiarid
1601	22.1	0.1381	arid
1602	9.7	0.1539	arid
1603	75	0.1532	arid
1604	9.5	0.1279	arid
1605	4	0.1548	arid
1606	7	0.1403	arid
1607	66	0.3276	semiarid
1608	90	0.3468	semiarid
1609	88	0.3468	semiarid
1610	86	0.3468	semiarid
1611	87	0.3468	semiarid
1612	86	0.3468	semiarid
1613	73	0.3468	semiarid
1614	4.2	0.1945	arid
1615	1.56	0.4076	semiarid
1616	7	0.1246	arid
1617	95.54	0.1301	arid
1618	88.66	0.1301	arid
1619	65.1	0.1301	arid
1620	56.72	0.1301	arid
1621	60	0.1312	arid
1622	83.8	0.1519	arid
1623	91.5	0.1331	arid
1624	6.5	0.1031	arid
1625	1	0.3786	semiarid
1626	7.5	0.3806	semiarid
1627	1	0.3794	semiarid
1628	0	0.3711	semiarid
1629	0	0.3771	semiarid
1630	0.2	0.186	arid
1631	0	0.3047	semiarid
1632	24	0.3222	semiarid
1633	0.4	0.2605	semiarid
1634	47.5	0.3036	semiarid
1635	39.3	0.0997	arid
1636	90	0.3468	semiarid
1637	85	0.3468	semiarid
1638	59.5	0.1838	arid
1639	16.5	0.1838	arid
1640	19	0.5037	dry subhumid
1641	47	0.1836	arid
1642	52.5	0.3413	semiarid
1643	47.7	0.1851	arid
1644	1	0.0391	hyperarid
1645	55	0.2409	semiarid
1646	18	0.0871	arid
1647	13.5	0.1111	arid
1648	20.6	0.7976	humid
1649	34	0.2516	semiarid
1650	25	0.1709	arid
1651	50	0.1709	arid
1652	5	0.6528	humid
1653	90	0.0352	hyperarid
1654	55	0.0979	arid
1655	41.3	0.0987	arid
1656	19.6	0.0927	arid
1657	50	0.0843	arid
1658	38.8	0.1254	arid
1659	58.8	0.2834	semiarid
1660	17.4	0.2251	semiarid
1661	36.6	0.1371	arid
1662	42.9	0.1351	arid
1663	2	0.1167	arid
1664	36.3	0.1325	arid
1665	38	0.1359	arid
1666	90	0.1039	arid
1667	60	0.1248	arid
1668	85	0.1321	arid
1669	10	0.1265	arid
1670	25	0.1282	arid
1671	1	0.0792	arid
1672	0	0.3746	semiarid
1673	30	0.1129	arid
1674	15	0.0895	arid
1675	0	0.0558	arid
1676	0	0.0105	hyperarid
1677	35	0.0257	hyperarid
1678	3	0.0358	hyperarid
1679	1	0.0358	hyperarid
1680	1	0.0358	hyperarid
1681	1	0.0358	hyperarid
1682	0	0.0085	hyperarid
1683	5	0.0273	hyperarid
1684	1	0.0273	hyperarid
1685	4	0.0937	arid
1686	15	0.0895	arid
1687	1	0.2155	semiarid
1688	0	0.0519	arid
1689	30	0.1142	arid
1690	0	0.1593	arid
1691	0	0.0827	arid
1692	5	0.0826	arid
1693	2	0.0209	hyperarid
1694	60	0.15	arid
1695	5	0.0933	arid
1696	0	0.1522	arid
1697	25	0.0597	arid
1698	20	0.1954	arid
1699	1	0.2157	semiarid
1700	70	0.0096	hyperarid
1701	64	0.1182	arid
1702	86	0.1157	arid
1703	95	0.1148	arid
1704	86	0.129	arid
1705	68	0.1162	arid
1706	84	0.1162	arid
1707	11	0.1162	arid
1708	64	0.1162	arid
1709	44	0.1295	arid
1710	44	0.1291	arid
1711	11.8	0.1469	arid
1712	20	0.2616	semiarid
1713	42.3	0.1264	arid
1714	25	0.1537	arid
1715	21.1	0.1302	arid
1716	0	0.2279	semiarid
1717	27.5	0.0987	arid
1718	14	0.2176	semiarid
1719	27.5	0.2338	semiarid
1720	44	0.155	arid
1721	1	0.4561	semiarid
1722	1	0.4579	semiarid
1723	1	0.4579	semiarid
1724	1	0.4579	semiarid
1725	1	0.4579	semiarid
1726	1	0.4579	semiarid
1727	1	0.4579	semiarid
1728	1	0.4579	semiarid
1729	1	0.4579	semiarid
1730	1	0.4579	semiarid
1731	1	0.4579	semiarid
1732	1	0.4579	semiarid
1733	1	0.4579	semiarid
1734	1	0.4317	semiarid
1735	1	0.4579	semiarid
1736	1	0.4579	semiarid
1737	5	0.4579	semiarid
1738	1	0.4579	semiarid
1739	1	0.4467	semiarid
1740	5	0.4467	semiarid
1741	1	0.4262	semiarid
1742	1	0.4262	semiarid
1743	1	0.4262	semiarid
1744	1	0.4262	semiarid
1745	1	0.5944	dry subhumid
1746	1	0.4579	semiarid
1747	35	0.4452	semiarid
1748	25	0.4452	semiarid
1749	10	0.449	semiarid
1750	3	0.4404	semiarid
1751	5	0.4484	semiarid
1752	10	0.445	semiarid
1753	2	0.445	semiarid
1754	1	0.445	semiarid
1755	2	0.445	semiarid
1756	5	0.445	semiarid
1757	10	0.445	semiarid
1758	15	0.4486	semiarid
1759	5	0.4465	semiarid
1760	2	0.4516	semiarid
1761	2	0.4516	semiarid
1762	20	0.448	semiarid
1763	20	0.448	semiarid
1764	3	0.4467	semiarid
1765	66	0.3925	semiarid
1766	3	0.3929	semiarid
1767	36	0.3929	semiarid
1768	96	0.3955	semiarid
1769	86	0.3925	semiarid
1770	80	0.3929	semiarid
1771	76	0.3929	semiarid
1772	80	0.3929	semiarid
1773	18	0.3929	semiarid
1774	50	0.3965	semiarid
1775	115	0.3929	semiarid
1776	70	0.3929	semiarid
1777	24	0.3925	semiarid
1778	70	0.3925	semiarid
1779	130	0.397	semiarid
1780	55	0.3915	semiarid
1781	2	0.3965	semiarid
1782	96	0.3965	semiarid
1783	98	0.3915	semiarid
1784	76	0.3965	semiarid
1785	2	0.3969	semiarid
1786	98	0.395	semiarid
1787	91	0.3925	semiarid
1788	1	0.3869	semiarid
1789	2	0.3897	semiarid
1790	50	0.3929	semiarid
1791	7	0.3929	semiarid
1792	28	0.3929	semiarid
1793	61	0.3897	semiarid
1794	5	0.3869	semiarid
1795	70	0.3965	semiarid
1796	50	0.3915	semiarid
1797	101	0.3914	semiarid
1798	41	0.3969	semiarid
1799	20	0.3969	semiarid
1800	2	0.3969	semiarid
1801	85	0.3955	semiarid
1802	60	0.3903	semiarid
1803	8	0.3965	semiarid
1804	80	0.3969	semiarid
1805	65	0.3969	semiarid
1806	27	0.3925	semiarid
1807	100	0.3914	semiarid
1808	30	0.3951	semiarid
1809	99	0.3951	semiarid
1810	55	0.3914	semiarid
1811	87	0.4006	semiarid
1812	96	0.4006	semiarid
1813	51	0.3893	semiarid
1814	3	0.6267	dry subhumid
1815	10	0.634	dry subhumid
1816	1	0.618	dry subhumid
1817	2	0.6345	dry subhumid
1818	7	0.6345	dry subhumid
1819	1	0.6345	dry subhumid
1820	2	0.6186	dry subhumid
1821	8	0.6192	dry subhumid
1822	20	0.6192	dry subhumid
1823	14	0.6192	dry subhumid
1824	2	0.6232	dry subhumid
1825	30	0.4891	semiarid
1826	30	0.4891	semiarid
1827	50	0.4891	semiarid
1828	1	0.4925	semiarid
1829	1	0.4925	semiarid
1830	30	0.4897	semiarid
1831	5	0.4897	semiarid
1832	1	0.4874	semiarid
1833	1	0.4874	semiarid
1834	1	0.4911	semiarid
1835	1	0.4859	semiarid
1836	1	0.4903	semiarid
1837	1	0.4903	semiarid
1838	30	0.4903	semiarid
1839	2	0.4903	semiarid
1840	1	0.4903	semiarid
1841	5	0.4903	semiarid
1842	50	0.4875	semiarid
1843	1	0.4875	semiarid
1844	40	0.4903	semiarid
1845	20	0.4875	semiarid
1846	1	0.4875	semiarid
1847	60	0.4875	semiarid
1848	1	0.4875	semiarid
1849	1	0.4875	semiarid
1850	1	0.4875	semiarid
1851	2	0.4875	semiarid
1852	30	0.4875	semiarid
1853	1	0.4875	semiarid
1854	20	0.4894	semiarid
1855	40	0.4993	semiarid
1856	50	0.4859	semiarid
1857	50	0.4996	semiarid
1858	15	0.4996	semiarid
1859	1	0.4996	semiarid
1860	50	0.4957	semiarid
1861	30	0.4957	semiarid
1862	1	0.4859	semiarid
1863	1	0.4859	semiarid
1864	1	0.4977	semiarid
1865	1	0.4897	semiarid
1866	10	0.4874	semiarid
1867	20	0.2903	semiarid
1868	15	0.3837	semiarid
1869	20	0.3837	semiarid
1870	2	0.2922	semiarid
1871	3	0.5769	dry subhumid
1872	19	0.4171	semiarid
1873	13	0.4669	semiarid
1874	6	0.5843	dry subhumid
1875	3	0.4826	semiarid
1876	28	0.2965	semiarid
1877	6	0.5067	dry subhumid
1878	25	0.2922	semiarid
1879	4	0.4633	semiarid
1880	1	0.3591	semiarid
1881	1	0.2742	semiarid
1882	1	0.3545	semiarid
1883	2	0.3545	semiarid
1884	6	0.2742	semiarid
1885	1	0.2935	semiarid
1886	6	0.2903	semiarid
1887	6	0.4319	semiarid
1888	4	0.4255	semiarid
1889	6	0.4319	semiarid
1890	4	0.2877	semiarid
1891	1	0.388	semiarid
1892	3	0.2903	semiarid
1893	3	0.2877	semiarid
1894	5	0.2903	semiarid
1895	45	0.3574	semiarid
1896	40	0.3556	semiarid
1897	1	0.3574	semiarid
1898	12	0.2922	semiarid
1899	2	0.3767	semiarid
1900	2	0.3972	semiarid
1901	3	0.3888	semiarid
1902	3	0.4235	semiarid
1903	4	0.4235	semiarid
1904	97	0.4436	semiarid
1905	72	0.4529	semiarid
1906	75	0.4529	semiarid
1907	80	0.5048	dry subhumid
1908	42	0.5154	dry subhumid
1909	2	0.3931	semiarid
1910	1	0.3931	semiarid
1911	4	0.3931	semiarid
1912	4	0.3931	semiarid
1913	4	0.3931	semiarid
1914	2	0.3765	semiarid
1915	1	0.3659	semiarid
1916	11	0.3931	semiarid
1917	25	0.3695	semiarid
1918	30	0.37	semiarid
1919	30	0.3695	semiarid
1920	27	0.395	semiarid
1921	60	0.3765	semiarid
1922	17	0.3662	semiarid
1923	75	0.3662	semiarid
1924	50	0.3662	semiarid
1925	70	0.3662	semiarid
1926	45	0.5154	dry subhumid
1927	42	0.3995	semiarid
1928	47	0.3662	semiarid
1929	60	0.3662	semiarid
1930	35	0.3921	semiarid
1931	27	0.3995	semiarid
1932	32	0.4024	semiarid
1933	37	0.4025	semiarid
1934	30	0.4445	semiarid
1935	45	0.4445	semiarid
1936	30	0.4799	semiarid
1937	35	0.4799	semiarid
1938	60	0.5154	dry subhumid
1939	85	0.3695	semiarid
1940	45	0.4445	semiarid
1941	130	0.3921	semiarid
1942	140	0.3765	semiarid
1943	130	0.3667	semiarid
1944	109	0.4717	semiarid
1945	120	0.4068	semiarid
1946	120	0.4815	semiarid
1947	70	0.3641	semiarid
1948	110	0.3641	semiarid
1949	130	0.4799	semiarid
1950	120	0.3659	semiarid
1951	92	0.4436	semiarid
1952	105	0.5207	dry subhumid
1953	125	0.5054	dry subhumid
1954	102	0.3667	semiarid
1955	100	0.4604	semiarid
1956	97	0.3679	semiarid
1957	102	0.4717	semiarid
1958	110	0.4717	semiarid
1959	97	0.4815	semiarid
1960	90	0.4799	semiarid
1961	105	0.3662	semiarid
1962	102	0.4805	semiarid
1963	107	0.4919	semiarid
1964	115	0.4436	semiarid
1965	120	0.4436	semiarid
1966	102	0.4436	semiarid
1967	105	0.4674	semiarid
1968	120	0.5207	dry subhumid
1969	90	0.5207	dry subhumid
1970	70	0.4025	semiarid
1971	55	0.4604	semiarid
1972	65	0.4445	semiarid
1973	25	0.4604	semiarid
1974	55	0.5154	dry subhumid
1975	76	0.4919	semiarid
1976	70	0.4805	semiarid
1977	75	0.4651	semiarid
1978	65	0.4717	semiarid
1979	95	0.4604	semiarid
1980	90	0.4043	semiarid
1981	100	0.4043	semiarid
1982	4	0.3662	semiarid
1983	4	0.3662	semiarid
1984	4	0.3679	semiarid
1985	26	0.4043	semiarid
1986	50	0.4025	semiarid
1987	32	0.4043	semiarid
1988	4	0.4815	semiarid
1989	52	0.3619	semiarid
1990	50	0.4799	semiarid
1991	37	0.4799	semiarid
1992	70	0.3662	semiarid
1993	40	0.4805	semiarid
1994	60	0.4983	semiarid
1995	50	0.4919	semiarid
1996	17	0.4919	semiarid
1997	105	0.5207	dry subhumid
1998	55	0.5207	dry subhumid
1999	102	0.3642	semiarid
[truncated: 1,849 more rows]
